# Supplementary material for: A sensitive approach for simultaneous quantification of carbonyl and hydroxyl steroids using 96-well SPE plates based on stable isotope coded-derivatization-UPLC-MRM: method development and application
Source: Royal Society of Chemistry journal article supplement (doi:10.1039/c8ra01372a), 2018-01-01
Supplement: c8ra01372a1.pdf [file c8ra01372a1.pdf]

## Electronic Supplementary Information

### **A sensitive approach for simultaneous quantification of carbonyl and hydroxyl steroid using 96-well SPE plates based on stable isotope coded-derivatization-UPLC-MRM: method development and application**

Chuanxin Liu<sup>&a</sup>, Xue Sheng<sup>&a</sup>, Yuming Wang<sup>&a</sup>, Jia Yin<sup>a</sup>, Wei Huang<sup>a</sup>, Yunshuang Fan<sup>b,c</sup>, Yubo Li<sup>\*a</sup> and Yanjun Zhang<sup>\*d</sup>

<sup>a</sup>*Tianjin State Key Laboratory of Modern Chinese Medicine, School of Traditional Chinese Materia Medica, Tianjin University of Traditional Chinese Medicine, 312 Anshan west Road, Tianjin 300193, China.*

<sup>b</sup>*State Key Laboratory of Separation Membranes and Membrane Processes, Tianjin Polytechnic University, Tianjin 300387, China.*

<sup>c</sup>*School of Environmental and Chemical Engineering, Tianjin Polytechnic University, Tianjin 300387, China.*

<sup>d</sup>*Tianjin State Key Laboratory of Modern Chinese Medicine, Tianjin University of Traditional Chinese Medicine, 312 Anshan west Road, Tianjin 300193, China.*

**&Co-first authors:** Chuanxin Liu, Xue Sheng and Yuming Wang

**\*Author for correspondence:**

**Prof. Yubo Li**

Tianjin State Key Laboratory of Modern Chinese Medicine, School of Traditional Chinese Materia Medica, Tianjin University of Traditional Chinese Medicine, 312 Anshan west Road, Tianjin 300193, China. E-mail: yaowufenxi001@sina.com.

**Prof. Yanjun Zhang**

Tianjin State Key Laboratory of Modern Chinese Medicine, Tianjin University of Traditional Chinese Medicine, 312 Anshan west Road, Tianjin 300193, China. E-mail: tianjin\_tcm001@sina.com.

Tel and Fax number: +86-22-59596221.

**Experimental****Chromatographic and mass spectrometric conditions of without derivatization**

UPLC analysis was performed on a UPLC H-CLASS Xevo TQ-D system (Waters, USA). Urine samples (10  $\mu$ L) were injected into an ACQUITY UPLC HSS T3 column (2.1 $\times$ 100 mm, 1.8  $\mu$ m, Waters). The column temperature was set to 40°C, and the flow rate was set to 0.4 mL/min. The UPLC separation system includes a binary solvent system with mobile phase A (0.1% ammonium acetate in water) and mobile phase B (acetonitrile). The gradient profiles for the urine samples were as follows: 0 min, A: 99%; 0–1.5 min, A: 33%; 1.5-10min, A: 0%; 10-11min, A: 99%. The H-CLASS/Xevo TQ-D was equipped with electrospray ionization in the positive and negative modes. In the positive ion MRM detection mode, the MS parameters were as follows: drying gas temperature, 460°C; capillary voltage, 1.5 kV; cone voltage, 50 V; atomizer, 7 bar; nitrogen solvent flow rate, 800 L h<sup>-1</sup>; conical airflow, 150 L h<sup>-1</sup>; impact gas flow: 0.14 mL/min; and evaporation gas and auxiliary gas: nitrogen. The scanning mode was used for multiple reaction monitoring (MRM); two sets of characteristic precursor ion/product ion pairs were selected, and their collision energy and declustering potential were optimized. A group of precursor ion/product ion with strong abundance was used for quantitative analysis (Table S1).

**Figure**

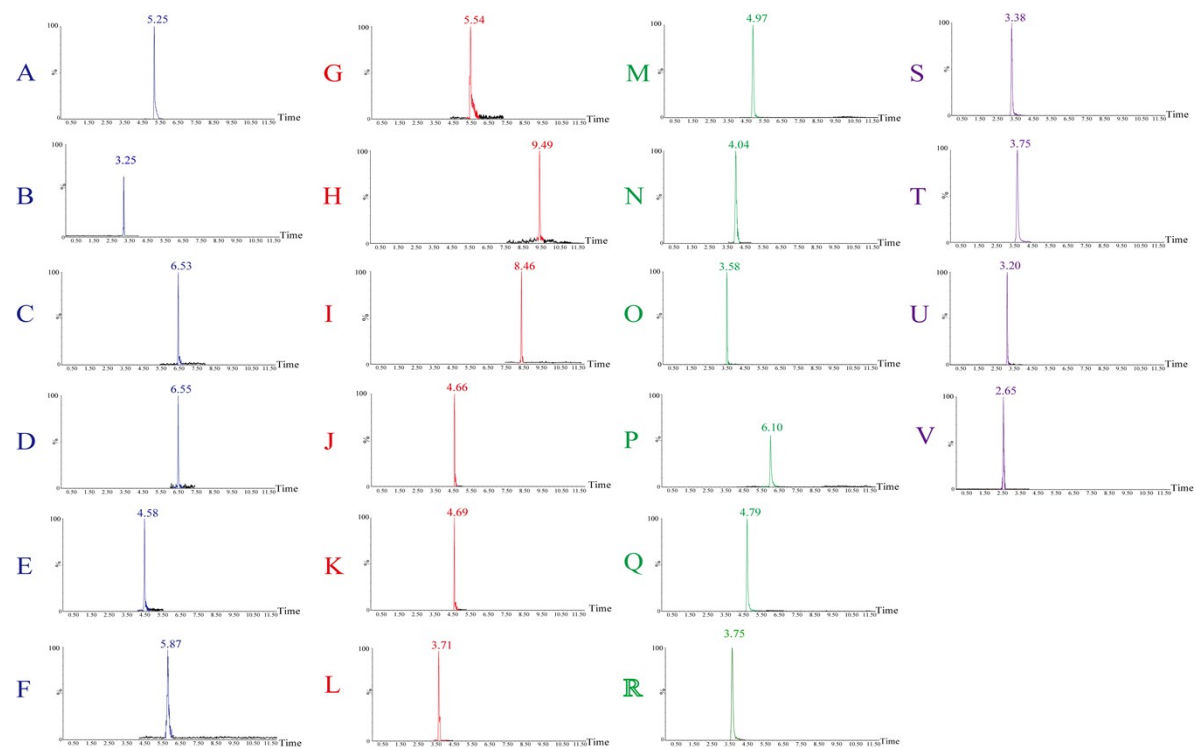

**Fig S1.** Chromatographic information for 22 steroid hormone standards. (A) 17 $\alpha$ OH-PROG (RT:5.25); (B)11 $\beta$ ,17 $\alpha$ ,21-trihydroxy-5 $\beta$ -pregnane-3,20dione (RT:3.25); (C) E<sub>1</sub> (RT:6.53);(D) 2-Methoxyestrone (RT:6.55); (E) Tetrahydrocortisol (RT:4.58); (F) PROG (RT:5.87); (G) Corticosterone (RT:8.52); (H) E<sub>2</sub> (RT:9.49); (I) Pregnandiol (RT:8.46); (J) 19-Hydroxyandrostenedione (RT:4.66); (K) Cortol (RT:4.69); (L)11 $\beta$ -Hydroxyandrost-4-ene-3,17-dione (RT:3.71) (M) Androsterone (RT:4.97) ; (N)11-Deoxycorticosterone (RT:4.04); (O) THB (RT:3.58); (P) 5 $\beta$ -Pregnane-3,20-dione (RT:6.10);(Q) PREG (RT:4.79); (R) DHEA (RT:3.75); (S) E<sub>3</sub> (RT:3.38); (T) TES (RT:3.75); (U) 17 $\alpha$ OH-PREG (RT:3.20); (V). Cortisone (RT:2.65).

**Table S1. Mass spectrometry information and conditions of non-derivatization substances**

| RT   | Substance                                                             | Precursor ion | Product ion | Dwell time (ms) | Collision energy (eV) | Cone voltage |
|------|-----------------------------------------------------------------------|---------------|-------------|-----------------|-----------------------|--------------|
| 3.83 | Cortisone                                                             | 361.2         | 163.3       | 0.009           | 24                    | 50           |
| 4.04 | 11 $\beta$ ,17 $\alpha$ ,21-Trihydroxy-5 $\beta$ -pregnane-3,20-dione | 365.1         | 333.1       | 0.009           | 6                     | 54           |
| 4.49 | E <sub>3</sub>                                                        | 271.3         | 133.2       | 0.009           | 38                    | 22           |
| 4.64 | THB                                                                   | 351.3         | 315.3       | 0.009           | 6                     | 30           |
| 4.8  | 11 $\beta$ -Hydroxyandrost-4-ene-3,17-dione                           | 303.2         | 105.2       | 0.009           | 40                    | 42           |
| 4.85 | TES                                                                   | 289.2         | 97.0        | 0.009           | 22                    | 44           |
| 4.86 | DHEA                                                                  | 289.2         | 253.3       | 0.009           | 12                    | 28           |
| 5.11 | 11-Deoxycorticosterone                                                | 331.2         | 109.1       | 0.009           | 28                    | 40           |
| 5.73 | PREG                                                                  | 317.2         | 285.2       | 0.009           | 4                     | 30           |
| 5.73 | 5 $\beta$ -Pregnane-3,20-dione                                        | 317.3         | 43.1        | 0.009           | 34                    | 34           |
| 6.68 | PROG                                                                  | 315.2         | 97.1        | 0.009           | 26                    | 42           |
| 8.59 | Cortol                                                                | 368.3         | 60.1        | 0.009           | 38                    | 64           |
| 7.98 | Tetrahydrocortisol                                                    | 367.0         | 335.1       | 0.009           | 6                     | 54           |
| 8.08 | 19-Hydroxyandrostenedione                                             | 303.2         | 91.1        | 0.009           | 44                    | 44           |
| 8.54 | 17 $\alpha$ OH-PROG                                                   | 331.3         | 97.1        | 0.009           | 22                    | 40           |
| 8.52 | Corticosterone                                                        | 347.3         | 121.1       | 0.009           | 22                    | 62           |
| 9.54 | E <sub>1</sub>                                                        | 272.9         | 243.5       | 0.009           | 8                     | 86           |
| 9.57 | 2-Methoxyestrone                                                      | 301.2         | 186.6       | 0.009           | 22                    | 46           |

|       |              |       |      |       |    |    |
|-------|--------------|-------|------|-------|----|----|
| 10.87 | Pregnanediol | 321.3 | 43.2 | 0.009 | 46 | 50 |
|-------|--------------|-------|------|-------|----|----|

**Table S2. The study on the conditions of derivation**

| Substance                 | Mass spectrometric response to EDC | Mass spectrometric response to EDC derivatization with |
|---------------------------|------------------------------------|--------------------------------------------------------|
|                           | derivatization with water          | dichloromethane                                        |
| Cortol                    | 4.10 e <sup>6</sup>                | 4.12 e <sup>6</sup>                                    |
| E <sub>2</sub>            | 8.80 e <sup>5</sup>                | 1.20 e <sup>6</sup>                                    |
| Tetrahydrocortisol        | 4.16 e <sup>5</sup>                | 4.54 e <sup>5</sup>                                    |
| 19-Hydroxyandrostenedione | 6.28 e <sup>5</sup>                | 6.9 e <sup>5</sup>                                     |
| 17αOH-PROG                | 7.40 e <sup>6</sup>                | 7.12 e <sup>6</sup>                                    |
| Corticosterone            | 5.28 e <sup>5</sup>                | 5.9 e <sup>5</sup>                                     |
| E <sub>1</sub>            | 2.83 e <sup>5</sup>                | 2.34 e <sup>5</sup>                                    |
| 2-Methoxyestrone          | 5.73 e <sup>5</sup>                | 5.24 e <sup>5</sup>                                    |
| Pregnanediol              | 5.60 e <sup>5</sup>                | 5.79 e <sup>5</sup>                                    |

**Table S3. Comparison of sensitivity of UPLC-MS/MS detection of steroid hormone without and with derivatization**

| Steroid hormones | Derivatization reagent | LLOQ (pg/mL)           |                                | Enhance fold |
|------------------|------------------------|------------------------|--------------------------------|--------------|
|                  |                        | Derivatization reagent | Without derivatization reagent |              |
| 17αOH-PROG       | DMBA                   | 5                      | 5                              | 1            |
| E <sub>1</sub>   | DMBA                   | 10                     | 5000                           | 500          |
| 2-Methoxyestrone | DMBA                   | 20                     | 500                            | 25           |

|                                                                       |      |      |        |     |
|-----------------------------------------------------------------------|------|------|--------|-----|
| Tetrahydrocortisol                                                    | DMBA | 50   | 200    | 4   |
| Corticosterone                                                        | DMBA | 50   | 500    | 10  |
| E <sub>2</sub>                                                        | DMBA | 20   | NOFI   | -   |
| Pregnandiol                                                           | DMBA | 50   | 50     | 1   |
| 19-Hydroxyandrostenedione                                             | DMBA | 200  | 2000   | 10  |
| Cortol                                                                | DMBA | 200  | 500    | 2.5 |
| 11-Desoxycorticosterone                                               | GP   | 5    | 5      | 1   |
| Tetrahydrocorticosterone                                              | GP   | 5    | 500    | 100 |
| 5 $\beta$ -Pregnane-3,20-dione                                        | GP   | 5    | 50     | 10  |
| PREG                                                                  | GP   | 5    | 1000   | 200 |
| E <sub>3</sub>                                                        | GP   | 10   | 20     | 2   |
| TES                                                                   | GP   | 10   | 100    | 10  |
| 17 $\alpha$ OH-PREG                                                   | GP   | 10   | NOFI   | -   |
| DHEA                                                                  | GP   | 20   | 10000  | 500 |
| Cortisone                                                             | GP   | 50   | 50     | 1   |
| 11 $\beta$ ,17 $\alpha$ ,21-Trihydroxy-5 $\beta$ -pregnane-3,20-dione | GP   | 1000 | >40000 | >40 |
| PROG                                                                  | GP   | 5000 | NOFI   | -   |

**NOFI:** not obtained fragment information

**Table S4. Comparison of value of steroid hormone containing carbonyl and hydroxyl with derivatization by DMBA and GP respectively**

| Substances         | Effective value    |                    |
|--------------------|--------------------|--------------------|
|                    | DMBA               | GP                 |
| 2-Methoxyestrone   | 3.29e <sup>6</sup> | 6.11e <sup>3</sup> |
| Tetrahydrocortisol | 1.67e <sup>5</sup> | 1.1e <sup>4</sup>  |

---

|                         |                    |                    |
|-------------------------|--------------------|--------------------|
| Corticosterone          | 7.74e <sup>4</sup> | 9.35e <sup>3</sup> |
| 11-Desoxycorticosterone | e <sup>2</sup>     | 4.09e <sup>3</sup> |
| 17αOH-PREG              | e <sup>2</sup>     | 2.75e <sup>4</sup> |
| Cortisone               | 1.04e <sup>3</sup> | 2.25e <sup>5</sup> |
| E <sub>3</sub>          | 3e <sup>3</sup>    | 2.03e <sup>5</sup> |
| TES                     | e <sup>3</sup>     | 6.02e <sup>3</sup> |

---
